# Supplementary material for: Linagliptin, a Selective Dipeptidyl Peptidase-4 Inhibitor, Reduces Physical and Behavioral Effects of Morphine Withdrawal
Source: MDPI journal article supplement (doi:10.3390/molecules27082478), 2022-04-12
Supplement: s1 [file s1]

## Supplementary data

To exclude the effect of minimal dose of ethanol in studied mice the locomotor activity test was performed. Opto-Varimex-4 Auto-Track (Columbus Instruments, Columbus, OH, USA) was used to evaluate spontaneous locomotor activity. The locomotor activity was measured as an arithmetic average distance (given in cm) travelled by a mouse  $\pm$  SEM.

The mice were divided into 6 groups (n=8). Each group received one of these solutions: 1) saline (0,9% NaCl); 2) saline + naloxone; 3) morphine + naloxone + saline; 4) vehicle (5 drops of ethanol 96° diluted in 0,9% of NaCl); 5) vehicle + naloxone; 6) morphine + naloxone + vehicle. Solutions were intraperitoneally administered in mice in a volume of 10.0 ml/kg. 10 minutes later the locomotor activity of mice was measured for 30 minutes. There were not observed any significant changes in locomotor activity of studied mice.

**Table S1.** The comparison of locomotor activity of mice.

| Drug                          | locomotor activity<br>(mean distance [cm] $\pm$ SEM) |
|-------------------------------|------------------------------------------------------|
| saline                        | 2503 $\pm$ 840                                       |
| saline + naloxone             | 2399 $\pm$ 109                                       |
| morphine + naloxone + saline  | 2821 $\pm$ 119                                       |
| vehicle                       | 2611 $\pm$ 970                                       |
| vehicle + naloxone            | 2411 $\pm$ 112                                       |
| morphine + naloxone + vehicle | 2506 $\pm$ 169                                       |
